# Supplementary material
Source: PubMed Central journal article supplement (PMC1525250)
Supplement: mbc_E06-04-0291_1.pdf [file mbc_E06-04-0291_1.pdf]

## SUPPLEMENTARY DATA

### **A cluster of ring stage-specific genes linked to a locus implicated in cytoadherence in *Plasmodium falciparum* codes for PEXEL negative and PEXEL positive proteins exported into the host cell**

Tobias Spielmann<sup>\*‡</sup>, Paula L. Hawthorne<sup>\*</sup>, Matthew W.A Dixon<sup>\*</sup>, Mandy Hannemann<sup>\*</sup>, Kathleen Klotz<sup>\*</sup>, David J. Kemp<sup>\*</sup>, Nectarios Klonis<sup>†</sup>, Leann Tilley<sup>†</sup>, Katharine R. Trenholme<sup>\*</sup>, and Donald L. Gardiner<sup>\*‡</sup>

\* Infectious Diseases and Immunology Division, Queensland Institute of Medical Research, PO Royal Brisbane Hospital, QLD 4029, Australia; and <sup>†</sup>Department of Biochemistry, La Trobe University, Melbourne 3086, Victoria, Australia

**Supplementary table S1\***

| <b>Primer</b> | <b>Sequence</b>                              |
|---------------|----------------------------------------------|
| PFI1715wF     | 5' -ATGATCTTTTGTAAAGATAAT-3'                 |
| PFI1715wR     | 5' -TTATGCGACTGGTACTGGTTC-3'                 |
| PFI1755wF     | 5' -ATGCAAACCCGTAAATATAAT-3'                 |
| PFI1755wR     | 5' -TTATGAAGAACTTGTACTTGG-3'                 |
| PFI1770wF     | 5' - ATGAAAGATCAGATTGAATCA-3'                |
| PFI1770wR     | 5' - TAATTACATATGTCTAGGTGT-3'                |
| PFI1775wF     | 5' -ATGGTTGCAAATGATTTATGG-3'                 |
| PFI1775wR     | 5' -TTAAAGTACATATTTCTTATT-3'                 |
| PFI1780wF     | 5' -ATTTTTCTTTAACTTGTTTCCTTTGG-3'            |
| PFI1780wR     | 5' -AGTTTAGCTGAAGCAAGTCCAG-3'                |
| PFI1785wF     | 5' -ATGTGGTTTTGTAATAAATTT-3'                 |
| PFI1785wR     | 5' -AATTCTTAAAGCGTTTTACC-3'                  |
| 40cfw         | 5' -AATAAGAATAAGCTTAAAAACAACAAAGGTTAAC-3'    |
| 40crv         | 5' -CTAATGTTGTTGTTGATCATACTG-3'              |
| 55cfw         | 5' -TTATCTGAACCAGTTGTAGAAGAAC-3'             |
| 55crv         | 5' -TTATGAAGAACTTGTACTTGGTTTAG-3'            |
| 60wfw         | 5' -GGTAGAACTTGTCCGAGTTA-3                   |
| 60wrv         | 5' -CACATTCTGACTGTATTTATTTTTATA-3'           |
| 60wfwAflII    | 5' -GGTGccttaagCTTACAAACAATAATGGGAAAT-3'     |
| 60wrvApaI     | 5' -CTTCgggcccCACATTCTGACTGTATTTATTTTTATA-3' |
| 60cfwfXhoI    | 5' -ACCGctcgagCTTACAAACAATAATGGGAAAT-3'      |
| 40cBamHI      | 5' -ggatccATGAAAATGTATTTAGCT-3'              |
| 40cPstI       | 5' -ctgcagATGTTGTTGTTGATCATA-3'              |
| 55cBamHI      | 5' -ggatccATGCAAACCCGTAAATAT-3'              |
| 55cPstI       | 5' -ctgcagTGAAGAACTTGTACTTGG-3'              |

\* restriction sites are shown in small letters
